# Supplementary material for: Freestanding CNT-modified graphitic carbon foam as a flexible anode for potassium ion batteries
Source: Royal Society of Chemistry journal article supplement (doi:10.1039/c9ta03245b), 2019-01-01
Supplement: c9ta03245b1.pdf [file c9ta03245b1.pdf]

## Supporting Information

### Freestanding Carbon-nanotubes-modified Graphitic Carbon Foam Film as a Flexible Anode for Potassium Ion Batteries

*Sifan Zeng*<sup>1, 2, 3</sup>, *Xuefeng Zhou*<sup>2</sup>, *Bin Wang*<sup>2</sup>, *Yuezhan Feng*<sup>5</sup>, *Rui Xu*<sup>2</sup>, *Haibin Zhang*<sup>1, \*</sup>,  
*Shuming Peng*<sup>1, 3, \*</sup>, *Yan Yu*<sup>2, 4\*</sup>

<sup>1</sup> Innovation Research Team for Advanced Ceramics, Institute of Nuclear Physics and Chemistry, China Academy of Engineering Physics, Mianyang, 621900, Sichuan, China. E-mail: hbzhang@caep.cn, pengshuming@caep.cn

<sup>2</sup> Hefei National Laboratory for Physical Sciences at the Microscale, Department of Materials Science and Engineering, Key Laboratory of Materials for Energy Conversion, Chinese Academy of Sciences (CAS), University of Science and Technology of China, Hefei, Anhui, 230026, China. Email: yanyumse@ustc.edu.cn

<sup>3</sup> Department of Engineering and Applied Physics, University of Science and Technology of China, Hefei, 230026, China

<sup>4</sup> Dalian National Laboratory for Clean Energy (DNL), Chinese Academy of Sciences (CAS), Dalian 116023, China

<sup>5</sup> Key Laboratory of Materials Processing and Mold, Ministry of Education, Zhengzhou University, Zhengzhou 450002, China

#### Experimental Section

**Synthesis of GCF.** The GCF was prepared by a chemical vapor deposition method with commercial nickel foam as a template. A mixed gas of CH<sub>4</sub>, H<sub>2</sub>, and Ar at flowing rates of 50, 50 and 200 sccm passed through Ni foam at 1000 °C holding 5 min in the tube furnace. And then, the sample was etched by FeCl<sub>3</sub>/HCl mixed solution after cooled down naturally. Lastly, the GCF was obtained after washing three times by deionized water and drying at 60 °C for 12 h.

**Synthesis of CNTs-modified GCF.** Firstly, the GCF film was immersed into 60 mL of mixed solution with 0.15 mmol  $\text{Ni}(\text{NO}_3)_2 \cdot 6\text{H}_2\text{O}$ , 0.3 mmol  $\text{Co}(\text{NO}_3)_2 \cdot 6\text{H}_2\text{O}$  and 1.8 mmol urea. After holding 120 °C for 2 h in an autoclave, NiCo@GCF precursor was annealed in air at 350 °C for 1 min and subsequently used as a catalyst-loaded substrate for growth of CNTs at 750 °C for 10 min in  $\text{C}_2\text{H}_4$ ,  $\text{H}_2$  and Ar atmosphere with the rates of 50, 50 and 200 sccm. Finally, the CNTs/GCF film was collected after etching in HCl solution, washing by deionized water and drying at 60 °C for 12 h.

**Materials characterization.** The electrical conductivity of the composites was measured by a four-probe method. The morphologies of the materials were investigated by Field-emission scanning electron microscopy (FESEM,). Transmission Electron Microscope (JEM-2100F, JEOL, Japan) was employed to measure TEM and HRTEM. The compositions of samples were studied by the X-Ray diffraction (XRD) by a Rigaku D/max-RB12 X-Ray diffractometer with  $\text{Cu K}\alpha$  radiation. The Raman spectra were tested through a microscopic confocal Raman spectrometer (Renishaw RM2000) with a wavelength of 514 nm at room temperature. In-situ Raman spectra were measured by a Raman spectrometer (Horiba) with a wavelength of 633nm.

**Electrochemical measurements.** 2032-type coin cells were assembled in an argon-filled glove box. The free-standing CNTs/GCF and GCF films were used as working electrodes coupled with K metal. Glass fiber (Whatman) was used as separators. The electrolyte solutions used in this work was 0.7M KPF<sub>6</sub> in a 1:1 (v/v) mixture of ethylene carbonate (EC) and diethyl carbonate (DEC). The galvanostatic charge-discharge tests were performed at different current densities within a voltage interval of 0.01-2.5 V. Cyclic voltammograms (CVs) scanned in a voltage window of 0.01-2.5 V at 0.2 mV/s and electrochemical impedance spectrum (EIS) in the frequency range of 100 kHz to 0.01 Hz was measured by an electrochemical station (CHI618D).

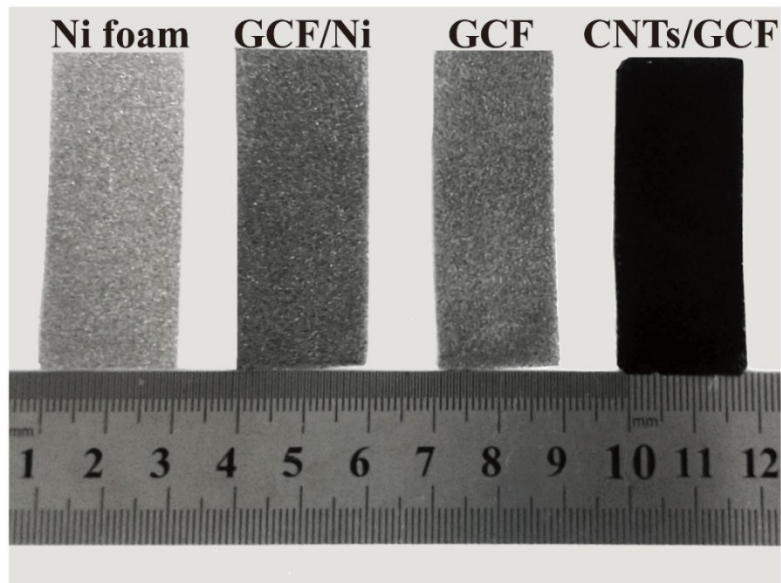

**Figure S1.** Optical images of inch-scaled Ni foam, GCF/Ni, GCF and CNTs/GCF.

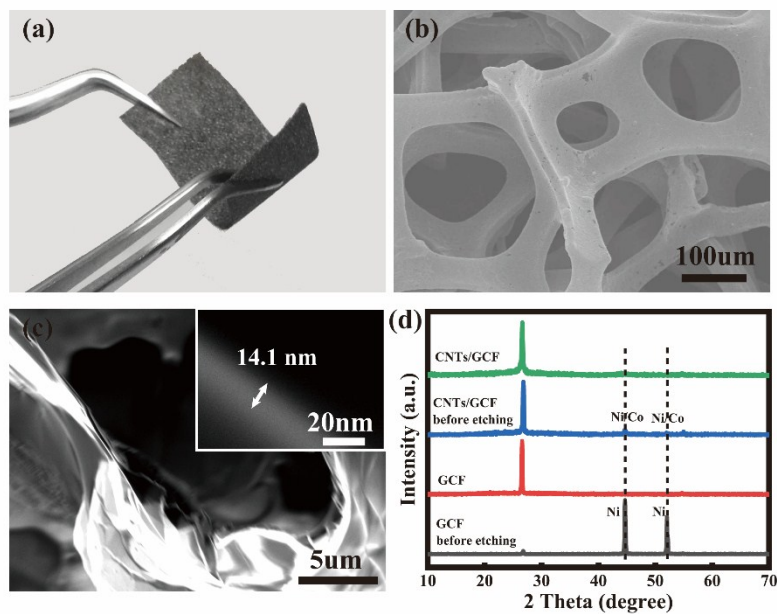

**Figure S2.** The SEM images of GCF film, (a) Optical, (b) top view, (c) cross-section view, (inset of (c)) single layer. (d) XRD patterns of all specimens before and after HCl etching

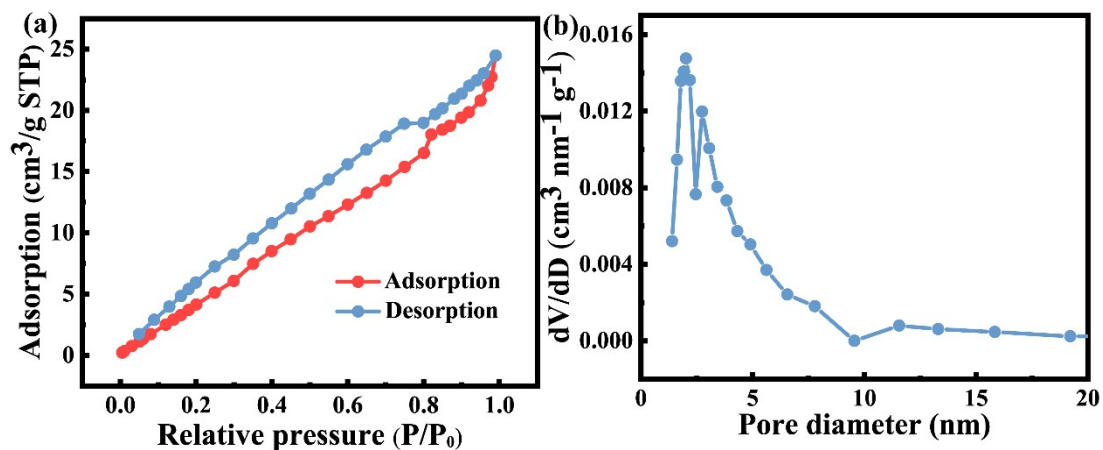

Figure S3. (a)  $N_2$  adsorption-desorption curves and (b) pore size distribution of GCF

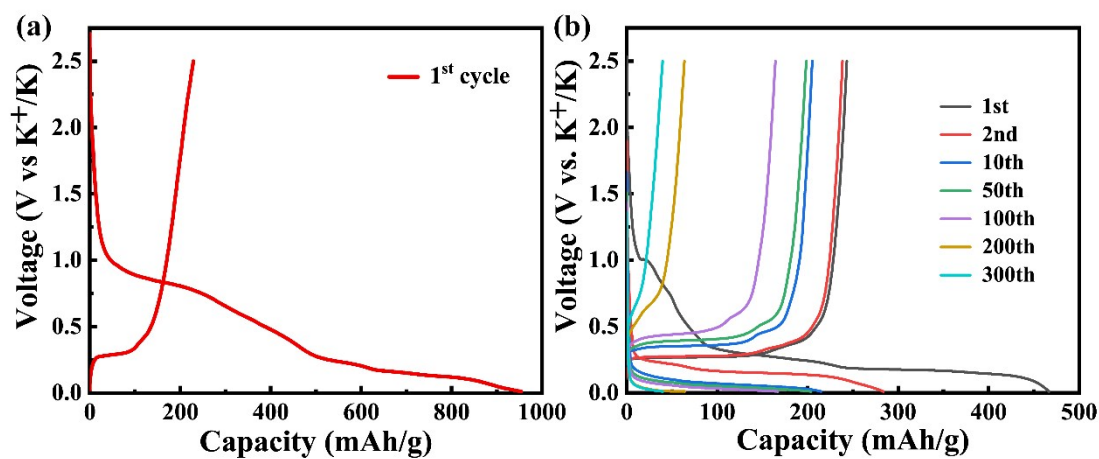

Figure S4. (a) The first discharge and charge profiles of CNTs/GCF and (b) Voltage profiles of GCF at 100 mA/g.

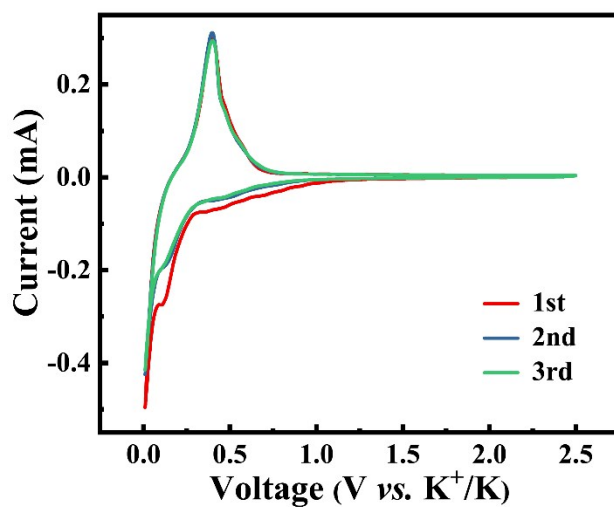

Figure S5. The CV curves of GCF at the scan rate of 0.2 mV/s.

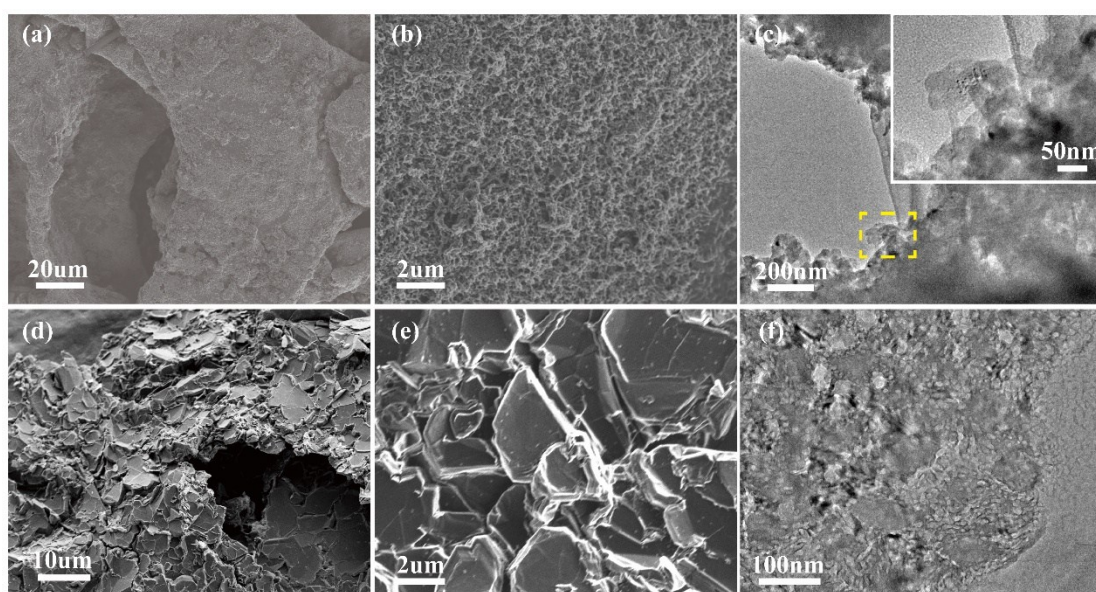

**Figure S6.** The morphology of CNTs/GCF and GCF films after cycles. (a, b) SEM and (c) TEM images of CNTs/GCF, (d, e) SEM and (f) TEM images of GCF.

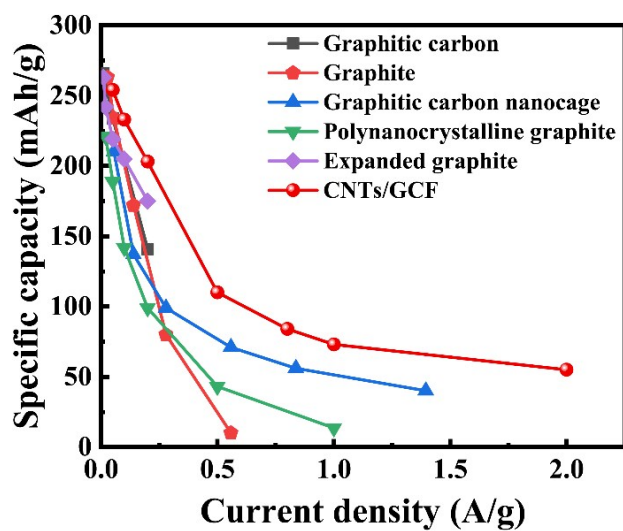

**Figure S7.** Comparison of rate capability with the reported graphitic carbon materials for KIBs.

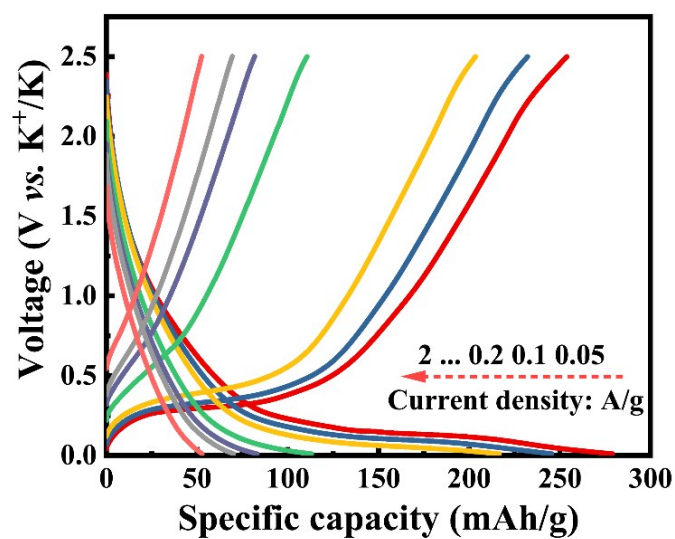

**Figure S8.** The discharge/charge profiles of CNTs/GCF at different current densities.

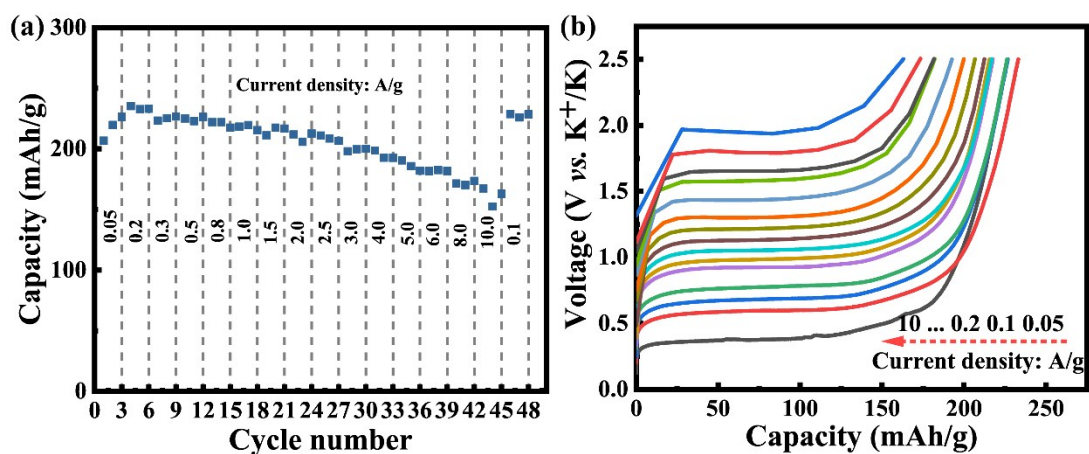

**Figure S9.** (a) The depotassiation capability with rate capability and (b) voltage profiles at different rates of GCF.

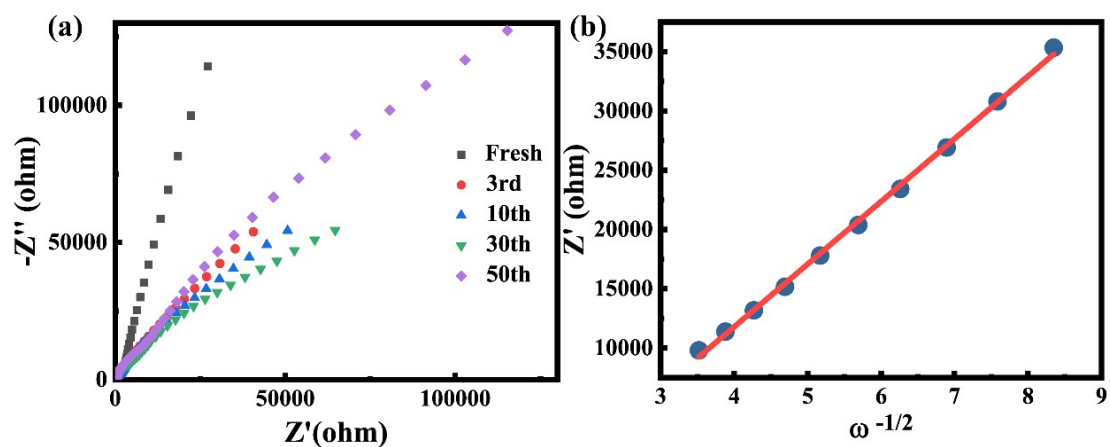

Figure S10. (a) EIS curves and (b) linear fits of  $Z'$  versus  $\omega^{-1/2}$  of GCF.

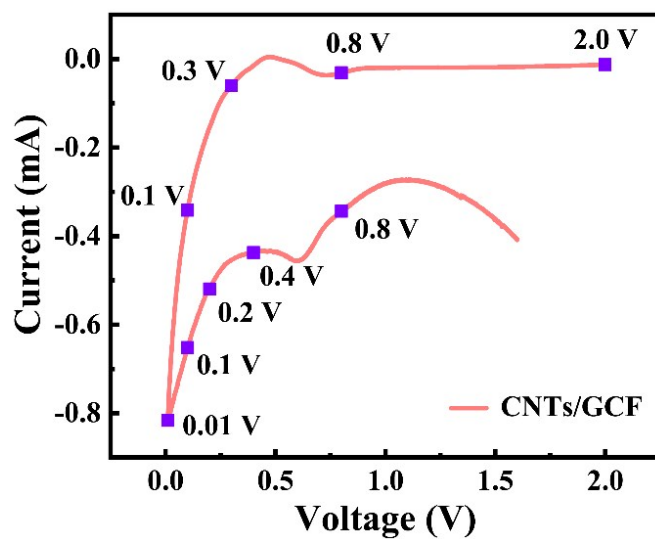

Figure S11. The first CV cycle of CNTs/GCF obtained from *in-situ* Raman experiments.



**Table S1.** Comparison of Carbon-based KIBs anodes reported in the literature

| <b>Materials</b>                    | <b>Current Density (mA/g)</b> | <b>Cycle Number</b> | <b>After Cycles Capacity below 0.25 V (mAh/g)</b> | <b>After Cycles Capacity (mAh/g)</b> | <b>Reference</b> |
|-------------------------------------|-------------------------------|---------------------|---------------------------------------------------|--------------------------------------|------------------|
| Graphite                            | 6.975                         | 2                   | ~255                                              | 325                                  | [1]              |
| N-doped CNTs mats                   | 20                            | 5                   | ~195                                              | 350                                  | [2]              |
| N-doped bamboo-like CNTs            | 500                           | 10                  | ~270                                              | 420                                  | [3]              |
| S-doped rGO                         | 50                            | 50                  | ~70                                               | 361                                  | [4]              |
| Graphitic carbon nanocage           | 55.8                          | 50                  | ~125                                              | 210                                  | [5]              |
| N-doped carbon fibers               | 55.8                          | 100                 | ~65                                               | 215                                  | [6]              |
| S, O-doped hard carbon              | 50                            | 100                 | ~76                                               | 226                                  | [7]              |
| Short-ordered mesoporous carbon     | 50                            | 100                 | ~57                                               | 257                                  | [8]              |
| N, O-doped hard carbon              | 50                            | 100                 | ~60                                               | 230.6                                | [9]              |
| Expanded graphite                   | 50                            | 200                 | ~200                                              | 228                                  | [10]             |
| Hard-soft carbon                    | 55.8                          | 440                 | ~100                                              | 200                                  | [11]             |
| N-doped porous carbon               | 100                           | 500                 | ~82                                               | 342                                  | [12]             |
| Hierarchical CNTs                   | 100                           | 500                 | ~70                                               | 210                                  | [13]             |
| Activated hollow carbon nanospheres | 2000                          | 1000                | ~45                                               | 190                                  | [14]             |
| CNTs/GCF                            | 100                           | 2                   | 258                                               | 332.9                                | This work        |
|                                     | 100                           | 500                 | 138                                               | 205                                  |                  |
|                                     | 100                           | 800                 | 143.5                                             | 228                                  |                  |



## Reference

1. Z. Jian, W. Luo, X. Ji, *J. Am. Chem. Soc.* **2015**, 137, 11566.
2. X. Zhao, Y. Tang, C. Ni, J. Wang, A. Star, Y. Xu, *ACS Appl. Mater. Interfaces* **2018**, 1, 1703.
3. Y. Liu, C. Yang, Q. Pan, Y. Li, G. Wang, X. Ou, F. Zheng, X. Xiong, M. Liu, Q. Zhang, *J. Mater. Chem. A* **2018**, 6, 15162.
4. J. Li, W. Qin, J. Xie, H. Lei, Y. Zhu, W. Huang, X. Xu, Z. Zhao, W. Mai, *Nano Energy* **2018**, 53, 415.
5. B. Cao, Q. Zhang, H. Liu, B. Xu, S. Zhang, T. Zhou, J. Mao, W. K. Pang, Z. Guo, A. Li, *Adv. Energy Mater.* **2018**, 8, 1801149.
6. R. Hao, H. Lan, C. Kuang, H. Wang, L. Guo, *Carbon* **2018**, 128, 224.
7. M. Chen, W. Wang, X. Liang, S. Gong, J. Liu, Q. Wang, S. Guo, H. Yang, *Adv. Energy Mater.* **2018**, 1800171.
8. W. Wang, J. Zhou, Z. Wang, L. Zhao, P. Li, Y. Yang, C. Yang, H. Huang, S. Guo, *Adv. Energy Mater.* **2018**, 8, 1701648.
9. J. Yang, Z. Ju, Y. Jiang, Z. Xing, B. Xi, J. Feng, S. Xiong, *Adv. Mater.* **2018**, 30, 1700104.
10. Y. An, H. Fei, G. Zeng, L. Ci, B. Xi, S. Xiong, J. Feng, *J. Power Sources* **2018**, 378, 66.
11. Z. Jian, S. Hwang, Z. Li, A. S. Hernandez, X. Wang, Z. Xing, D. Su, X. Ji, *Adv. Funct. Mater.* **2017**, 27, 1700324.
12. D. Li, X. Ren, Q. Ai, Q. Sun, L. Zhu, Y. Liu, Z. Liang, R. Peng, P. Si, J. Lou, *Adv. Energy Mater.* **2018**, 1802386.
13. Y. Wang, Z. Wang, Y. Chen, H. Zhang, M. Yousaf, H. Wu, M. Zou, A. Cao, R. P. Han, *Adv. Mater.* **2018**, 30, 1802074.
14. G. Wang, X. Xiong, D. Xie, Z. Lin, J. Zheng, F. Zheng, Y. Li, Y. Liu, C. Yang, M. Liu, *J. Mater. Chem. A* **2018**.
